# Supplementary material
Source: MDPI journal article supplement (https://www.mdpi.com/2073-4441/15/2/302)
Supplement: s1 [file s1]

**Supplementary Material S1A.** Species recorded in this study in El Limón during 2018, 2019 and 2020.

|                                       |                                 |                                  |
|---------------------------------------|---------------------------------|----------------------------------|
| Cyanobacteria                         | <i>Closterium</i> sp            | <i>Staurostrum</i> sp            |
| <i>Anabaenopsis ambigua</i>           | <i>Coelastrum indicum</i>       | <i>Staurodesmus</i> sp           |
| <i>Anabaenopsis elenkinii</i>         | <i>Coelastrum microporum</i>    | <i>Tetraëdron minimum</i>        |
| <i>Aphanizomenon gracile</i>          | <i>Coelastrum reticulatum</i>   | <i>Tetraëdron regulare</i>       |
| <i>Aphanocapsa delicatissima</i>      | <i>Coenocystis planctonica</i>  | <i>Tetrastrum triangulare</i>    |
| <i>Chroococcus dispersus</i>          | <i>Comasiella arcuata</i>       | <i>Willea irregularis</i>        |
| <i>Chroococcus minimus</i>            | <i>Cosmarium</i> sp             | <i>Bacillariophyceae</i>         |
| <i>Chroococcus turgidus</i>           | <i>Cosmarium exigum</i>         | <i>Achnantidium minutissima</i>  |
| <i>Coelomoron pusillum</i>            | <i>Crucigenia lauterbonii</i>   | <i>Anomoneis</i> sp              |
| <i>Coelomoron tropicale</i>           | <i>Crucigenia tetrapedia</i>    | <i>Aulacoseria granulata</i>     |
| <i>Cyanodictyon intermedium</i>       | <i>Desmodesmus brasiliensis</i> | <i>Cyclotella meneghiniana</i>   |
| <i>Cylindrospermopsis raciborskii</i> | <i>Desmodesmus spinosus</i>     | <i>Cyclotella stelligera</i>     |
| <i>Dolichospermum</i> sp              | <i>Dictyosphaerium</i>          | <i>Cymbella affinis</i>          |
| <i>Glaucospira agilissima</i>         | <i>tetractomum</i>              | <i>Fragilaria tenera</i>         |
| <i>Glaucospira laxissima</i>          | <i>Dimorphococcus lunatus</i>   | <i>Navicula salinarum</i>        |
| <i>Leptolyngbya fragilis</i>          | <i>Gonatozygon pilosum</i>      | <i>Nitzschia palea</i>           |
| <i>Limnithrix redekei</i>             | <i>Kirchneriella operta</i>     | <i>Nitzschia paleaformis</i>     |
| <i>Merismopedia convoluta</i>         | <i>Monoraphidium arcuatum</i>   | <i>Planothidium</i> sp           |
| <i>Merismopedia elegans</i>           | <i>Monoraphidium contortum</i>  | <i>Psammothidium</i> sp          |
| <i>Merismopedia punctata</i>          | <i>Monoraphidium griffithii</i> | <i>Ulnaria ulna</i>              |
| <i>Merismopedia tenuissima</i>        | <i>Monoraphidium komarkovae</i> | <i>Dinophyta (Miozoa)</i>        |
| <i>Microcystis aeruginosa</i>         | <i>Monoraphidium minutum</i>    | <i>Ceratium hirundinella</i>     |
| <i>Planktolyngbya limnetica</i>       | <i>Nephrocystium</i> sp         | <i>Gymnodinium</i> sp            |
| <i>Pseudanabaena catenata</i>         | <i>Oocystidium</i> sp           | <i>Peridinium umbonatum</i>      |
| <i>Pseudanabaena limnetica</i>        | <i>Oocystis solitaria</i>       | <i>Euglenophyta (Euglenozoa)</i> |
| <i>Radiocystis geminata</i>           | <i>Pandorina morum</i>          | <i>Euglena polymorpha</i>        |
| <i>Raphidiopsis curvata</i>           | <i>Pediastrum duplex</i>        | <i>Lepocinclis ovum</i>          |
| <i>Raphidiopsis mediterranea</i>      | <i>Planktosphaeria</i> sp       | <i>Lepocinclis texta</i>         |
| <i>Snowella litoralis</i>             | <i>Pseudodidymocystis fina</i>  | <i>Trachelomonas planctonica</i> |
| <i>Synechococcus elongatus</i>        | <i>Raphidocelis contorta</i>    | <i>Cryptophyta (Cryptista)</i>   |
| <i>Synechocystis aquatilis</i>        | <i>Scenedesmus acunae</i>       | <i>Chylomonas</i> sp             |
| <i>Trichodesmium</i>                  | <i>Scenedesmus alternans</i>    | <i>Cryptomonas erosa</i>         |
| <i>Woronichinia compacta</i>          | <i>Scenedesmus arcuatus</i>     | <i>Cryptomonas pyrenoidifera</i> |
| <i>Woronichinia ruzickae</i>          | <i>Scenedesmus disciformis</i>  | <i>Rhodomonas lacustris</i>      |
| Chlorophyta                           | <i>Scenedesmus ecornis</i>      | <i>Ochrophyta</i>                |
| <i>Ankistrodesmus falcatus</i>        | <i>Scenedesmus spinosus</i>     | <i>Ochromonas</i> sp             |
| <i>Ankistrodesmus stipitatus</i>      | <i>Schroederia setigera</i>     | <i>Xanthophyta</i>               |
| <i>Carteria multifilis</i>            | <i>Sphaerocystis schroeteri</i> | <i>Isthmochloron lobulatum</i>   |
| <i>Chlamydomonas globosa</i>          |                                 |                                  |
| <i>Chlorococcum</i> sp                |                                 |                                  |
| <i>Chorella</i> sp                    |                                 |                                  |

**Supplementary Material S1B.** Cyanobacteria species recorded in this study in El Limón during 2018, 2019 and

2020

| <b>Cyanobacteria</b>                  | <b>2018</b> | <b>2019-2020</b> |
|---------------------------------------|-------------|------------------|
| <i>Anabaenopsis ambigua</i>           | x           | x                |
| <i>Anabaenopsis elenkinii</i>         | x           |                  |
| <i>Aphanizomenon gracile</i>          | x           | x                |
| <i>Aphanocapsa delicatissima</i>      | x           | X                |
| <i>Chroococcus dispersus</i>          | x           |                  |
| <i>Chroococcus minimus</i>            | x           |                  |
| <i>Chroococcus turgidus</i>           | x           |                  |
| <i>Coelomoron pusillum</i>            | x           |                  |
| <i>Coelomoron tropicale</i>           | x           |                  |
| <i>Cyanodictyon intermedium</i>       | x           |                  |
| <i>Cylindrospermopsis raciborskii</i> | x           | X                |
| <i>Dolichospermum sp.</i>             | x           | X                |
| <i>Glaucospira agilissima</i>         |             | X                |
| <i>Glaucospira laxissima</i>          | x           | X                |
| <i>Leptolyngbya fragilis</i>          | x           | X                |
| <i>Limnothrix redekei</i>             | x           |                  |
| <i>Merismopedia convoluta</i>         | x           |                  |
| <i>Merismopedia elegans</i>           | x           | X                |
| <i>Merismopedia punctata</i>          | x           | X                |
| <i>Merismopedia tenuissima</i>        | x           | X                |
| <i>Microcystis aeruginosa</i>         | x           | X                |
| <i>Planktolyngbya limnetica</i>       | x           |                  |
| <i>Pseudanabaena catenata</i>         |             | X                |
| <i>Pseudanabaena limnetica</i>        | x           | X                |
| <i>Radiocystis geminata</i>           | x           |                  |
| <i>Raphidiopsis curvata</i>           | x           | x                |
| <i>Raphidiopsis mediterranea</i>      | x           | X                |
| <i>Snowella litoralis</i>             | x           | X                |
| <i>Synechococcus elongatus</i>        | x           |                  |
| <i>Synechocystis aquatilis</i>        | x           |                  |
| <i>Trichodesmium</i>                  | x           |                  |
| <i>Woronichinia compacta</i>          | x           |                  |
| <i>Woronichinia ruzickae</i>          | x           |                  |

**Supplementary material S2.** Morphometric variables measured for AG, AD, CYL and RM.

| Specie                                             | Variable              | (2018) |       | (2019) |       | Jan-20 |       |
|----------------------------------------------------|-----------------------|--------|-------|--------|-------|--------|-------|
|                                                    |                       | Mean   | SD    | Mean   | SD    | Mean   | SD    |
| <b><i>Aphanizomenon gracile</i> (AG)</b>           | Width/Length (W/L)    | 32.19  | 9.21  | 36.47  | 14.27 | 34.53  | 12.83 |
|                                                    | Heterocytes/ind       | 0.77   | 0.6   | 0.78   | 0.68  | 0.76   | 0.49  |
|                                                    | Heterocytes frequency | 0.03   | 0.02  | 0.03   | 0.02  | 0.03   | 0.02  |
|                                                    | Akinetes frequency    | 0.0042 | 0.01  | 0.0037 | 0.01  | 0.037  | 0.01  |
| <b><i>Aphanocapsa delicatissima</i> (AD)</b>       | Minor diameter A (µm) | 5.7    | 1.35  | 5.65   | 1.29  | 6.58   | 1.7   |
|                                                    | Mayor diameter B (µm) | 7.11   | 1.74  | 6.96   | 1.48  | 7.54   | 1.81  |
|                                                    | A/B                   | 0.81   | 0.12  | 0.82   | 0.12  | 0.88   | 0.13  |
| <b><i>Cylindrospermopsis raciborskii</i> (CYL)</b> | W/L                   | 31.4   | 14.95 | 34.89  | 12.73 | 36.83  | 13.68 |
|                                                    | Heterocytes/ind       | 1      | 0     | 1      | 0     | 1      | 0     |
|                                                    | Heterocytes frequency | 0.15   | 0.06  | 0.14   | 0.1   | 0.14   | 0.1   |
| <b><i>Raphidiopsis mediterranea</i> (RM)</b>       | W/L                   | 33.05  | 11.88 | 41.31  | 13.94 | 34.09  | 9.82  |

**Supplementary Material S3:** Additional information on the rigor of chamber counts according to the Utermöhl technique. \* *The maximum count error was calculated using the t-student distribution considering the number of fields per camera and the abundances of the most frequent species according to the criteria proposed by Venrick 1978.*

| Sample       | Abundance counted (individual) | Maximum counting error | Fields |
|--------------|--------------------------------|------------------------|--------|
| September/18 | 648                            | 6.11                   | 38     |
| October/18   | 914                            | 4.3                    | 54     |
| November/18  | 745                            | 8.7                    | 48     |
| December/18  | 444                            | 1.64                   | 31     |
| September/19 | 482                            | 6,1                    | 27     |
| October/19   | 624                            | 6.02                   | 24     |
| November/19  | 765                            | 3.54                   | 24     |
| December/19  | 944                            | 0.94                   | 19     |
| January/20   | 307                            | 13                     | 26     |
